# Supplementary material
Source: publisher figshare collection journal article supplement (https://frontiersin.figshare.com/ndownloader/files/22303101)
Supplement: Supplementary file [file 22303101]

## Supplementary Material

### 1 SUPPLEMENTARY TABLES AND FIGURES

#### 1.1 Figures

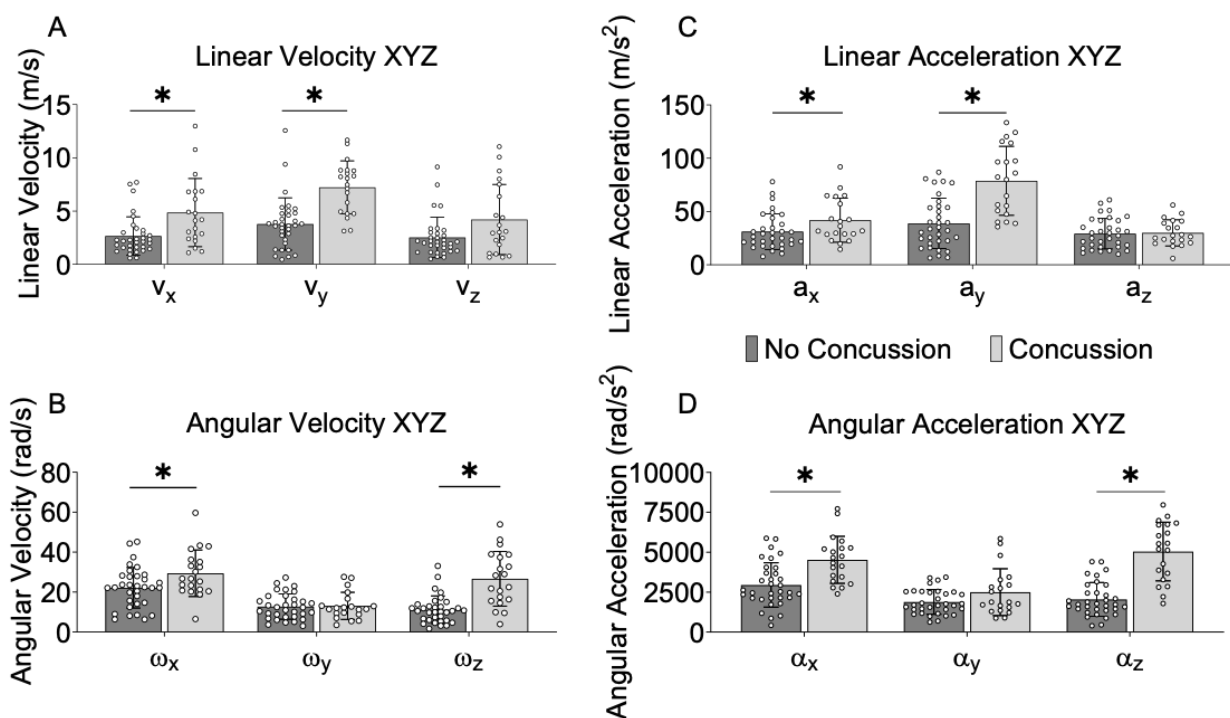

**Figure S1. Linear kinematics in x- and y-directions and angular kinematics in x- and z-directions are significantly different for no concussion versus concussion impacts. (A)** There was a significant difference for linear velocity in the x-direction and y-direction, and **(B)** angular velocity in the x-direction and z-direction. **(C)** There was a significant difference for linear acceleration in the x-direction and y-direction, and **(D)** angular acceleration in the x-direction and z-direction. \* indicates significance at the  $\alpha = 0.05$  level; Wilcoxon Rank-Sum Test.

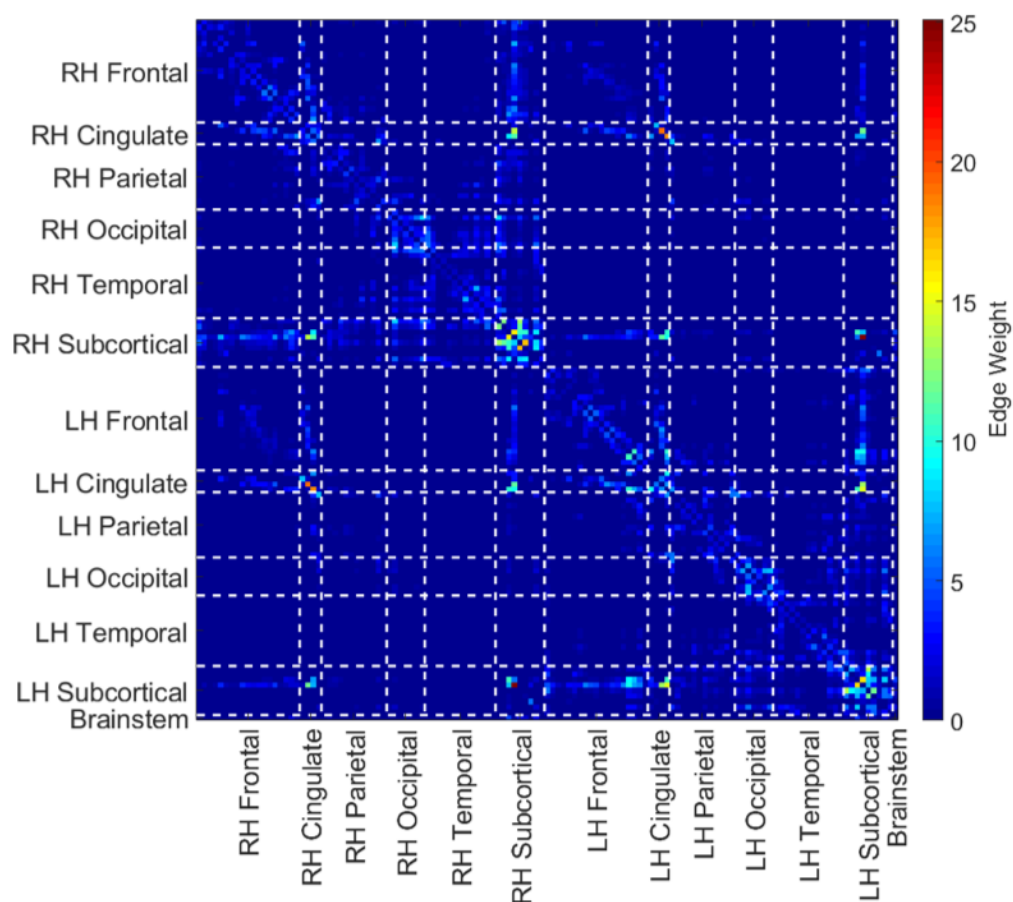

**Figure S2. Structural Connectivity.** The structural connectivity matrix represents the strength of connection (edge weight) between two brain regions. Regions 1-64 represent the right hemisphere (RH) and regions 65-128 represent the left hemisphere (LH). Region 129 is the brainstem. This connectivity matrix represents one healthy subject.

## 1.2 Tables

Table S1: **List of brain regions.** Brain regions used for analysis. RH denotes right hemisphere; LH denotes left hemisphere.

| Region Number | Region Name                | Region Number | Region Name                |
|---------------|----------------------------|---------------|----------------------------|
| 1             | RH Lateral Orbitofrontal 1 | 65            | LH Lateral Orbitofrontal 1 |
| 2             | RH Lateral Orbitofrontal 2 | 66            | LH Lateral Orbitofrontal 2 |
| 3             | RH Pars Orbitalis 1        | 67            | LH Pars Orbitalis 1        |
| 4             | RH Frontal Pole 1          | 68            | LH Frontal Pole 1          |
| 5             | RH Medial Orbitofrontal 1  | 69            | LH Medial Orbitofrontal 1  |
| 6             | RH Medial Orbitofrontal 2  | 70            | LH Pars Triangularis 1     |
| 7             | RH Pars Triangularis 1     | 71            | LH Pars Opercularis 1      |

Table S1: **List of brain regions.** Brain regions used for analysis. RH denotes right hemisphere; LH denotes left hemisphere.

| Region Number | Region Name                     | Region Number | Region Name                     |
|---------------|---------------------------------|---------------|---------------------------------|
| 8             | RH Pars Opercularis 1           | 72            | LH Rostral Middle Frontal 1     |
| 9             | RH Rostral Middle Frontal 1     | 73            | LH Rostral Middle Frontal 2     |
| 10            | RH Rostral Middle Frontal 2     | 74            | LH Rostral Middle Frontal 3     |
| 11            | RH Superior Frontal 1           | 75            | LH Superior Frontal 1           |
| 12            | RH Superior Frontal 2           | 76            | LH Superior Frontal 2           |
| 13            | RH Superior Frontal 3           | 77            | LH Superior Frontal 3           |
| 14            | RH Superior Frontal 4           | 78            | LH Superior Frontal 4           |
| 15            | RH Caudal Middle Frontal 1      | 79            | LH Caudal Middle Frontal 1      |
| 16            | RH Precentral 1                 | 80            | LH Precentral 1                 |
| 17            | RH Precentral 2                 | 81            | LH Precentral 2                 |
| 18            | RH Precentral 3                 | 82            | LH Precentral 3                 |
| 19            | RH Paracentral 1                | 83            | LH Precentral 4                 |
| 20            | RH Rostral Anterior Cingulate 1 | 84            | LH Paracentral 1                |
| 21            | RH Caudal Anterior Cingulate 1  | 85            | LH Rostral Anterior Cingulate 1 |
| 22            | RH Posterior Cingulate 1        | 86            | LH Caudal Anterior Cingulate 1  |
| 23            | RH Isthmus Cingulate 1          | 87            | LH Posterior Cingulate 1        |
| 24            | RH Postcentral 1                | 88            | LH Isthmus Cingulate 1          |
| 25            | RH Postcentral 2                | 89            | LH Postcentral 1                |
| 26            | RH Supramarginal 1              | 90            | LH Postcentral 2                |
| 27            | RH Supramarginal 2              | 91            | LH Postcentral 3                |
| 28            | RH Superior Parietal 1          | 92            | LH Supramarginal 1              |
| 29            | RH Superior Parietal 2          | 93            | LH Supramarginal 2              |
| 30            | RH Superior Parietal 3          | 94            | LH Superior Parietal 1          |
| 31            | RH Inferior Parietal 1          | 95            | LH Superior Parietal 2          |
| 32            | RH Inferior Parietal 2          | 96            | LH Superior Parietal 3          |
| 33            | RH Inferior Parietal 3          | 97            | LH Inferior Parietal 1          |
| 34            | RH Precuneus 1                  | 98            | LH Inferior Parietal 2          |
| 35            | RH Precuneus 2                  | 99            | LH Precuneus 1                  |
| 36            | RH Cuneus 1                     | 100           | LH Precuneus 2                  |
| 37            | RH Pericalcarine 1              | 101           | LH Cuneus 1                     |
| 38            | RH Lateral Occipital 1          | 102           | LH Pericalcarine 1              |
| 39            | RH Lateral Occipital 2          | 103           | LH Lateral Occipital 1          |
| 40            | RH Lateral Occipital 3          | 104           | LH Lateral Occipital 2          |
| 41            | RH Lingual 1                    | 105           | LH Lingual 1                    |
| 42            | RH Lingual 2                    | 106           | LH Lingual 2                    |
| 43            | RH Fusiform 1                   | 107           | LH Fusiform 1                   |
| 44            | RH Fusiform 2                   | 108           | LH Fusiform 2                   |
| 45            | RH Parahippocampal 1            | 109           | LH Parahippocampal 1            |
| 46            | RH Entorhinal 1                 | 110           | LH Entorhinal 1                 |

Table S1: **List of brain regions.** Brain regions used for analysis. RH denotes right hemisphere; LH denotes left hemisphere.

| Region Number | Region Name              | Region Number | Region Name              |
|---------------|--------------------------|---------------|--------------------------|
| 47            | RH Temporal Pole 1       | 111           | LH Temporal Pole 1       |
| 48            | RH Inferior Temporal 1   | 112           | LH Inferior Temporal 1   |
| 49            | RH Inferior Temporal 2   | 113           | LH Inferior Temporal 2   |
| 50            | RH Middle Temporal 1     | 114           | LH Middle Temporal 1     |
| 51            | RH Middle Temporal 2     | 115           | LH Middle Temporal 2     |
| 52            | RH Banks of STS 1        | 116           | LH Banks of STS 1        |
| 53            | RH Superior Temporal 1   | 117           | LH Superior Temporal 1   |
| 54            | RH Superior Temporal 2   | 118           | LH Superior Temporal 2   |
| 55            | RH Transverse Temporal 1 | 119           | LH Transverse Temporal 1 |
| 56            | RH Insula 1              | 120           | LH Insula 1              |
| 57            | RH Insula 2              | 121           | LH Insula 2              |
| 58            | RH Thalamus Proper       | 122           | LH Thalamus Proper       |
| 59            | RH Caudate               | 123           | LH Caudate               |
| 60            | RH Putamen               | 124           | LH Putamen               |
| 61            | RH Pallidum              | 125           | LH Pallidum              |
| 62            | RH Accumbens Area        | 126           | LH Accumbens Area        |
| 63            | RH Hippocampus           | 127           | LH Hippocampus           |
| 64            | RH Amygdala              | 128           | LH Amygdala              |
|               |                          | 129           | Brainstem                |

Table S2: **Intersubject prediction analysis.** Performance using the rMPS in each individual subject's High  $\Delta$ GE Regions as predictors.

| Subject Number & Number of Regions | Accuracy | Sensitivity | Specificity | AUC-Testing | AUC-Training Average |
|------------------------------------|----------|-------------|-------------|-------------|----------------------|
| Subject 1 - 1                      | 0.83     | 0.70        | 0.91        | 0.85        | 0.88                 |
| Subject 2 - 1                      | 0.85     | 0.75        | 0.91        | 0.87        | 0.90                 |
| Subject 3 - 1                      | 0.83     | 0.70        | 0.91        | 0.85        | 0.88                 |
| Subject 4 - 1                      | 0.85     | 0.75        | 0.91        | 0.87        | 0.90                 |
| Subject 5 - 1                      | 0.83     | 0.70        | 0.91        | 0.85        | 0.88                 |
| Subject 6 - 1                      | 0.85     | 0.75        | 0.91        | 0.87        | 0.90                 |
| Subject 7 - 1                      | 0.83     | 0.70        | 0.91        | 0.85        | 0.88                 |
| Subject 8 - 1                      | 0.83     | 0.70        | 0.91        | 0.85        | 0.88                 |
| Subject 9 - 1                      | 0.85     | 0.75        | 0.91        | 0.87        | 0.90                 |
| Subject 10 - 1                     | 0.83     | 0.70        | 0.91        | 0.85        | 0.88                 |
| Subject 11 - 1                     | 0.85     | 0.75        | 0.91        | 0.87        | 0.90                 |

Table S2: **Intersubject prediction analysis.** Performance using the rMPS in each individual subject's High  $\Delta$ GE Regions as predictors.

| Subject Number & Number of Regions | Accuracy | Sensitivity | Specificity | AUC-Testing | AUC-Training Average |
|------------------------------------|----------|-------------|-------------|-------------|----------------------|
| Subject 12 - 1                     | 0.77     | 0.65        | 0.85        | 0.82        | 0.85                 |
| Subject 13 - 1                     | 0.81     | 0.70        | 0.88        | 0.86        | 0.89                 |
| Subject 14 - 1                     | 0.83     | 0.70        | 0.91        | 0.85        | 0.88                 |
| Subject 15 - 1                     | 0.83     | 0.70        | 0.91        | 0.85        | 0.88                 |
| Subject 16 - 1                     | 0.85     | 0.75        | 0.91        | 0.87        | 0.90                 |
| Subject 17 - 1                     | 0.85     | 0.75        | 0.91        | 0.87        | 0.90                 |
| Subject 18 - 1                     | 0.83     | 0.70        | 0.91        | 0.85        | 0.88                 |
| Subject 19 - 1                     | 0.85     | 0.75        | 0.91        | 0.87        | 0.90                 |
| Subject 20 - 1                     | 0.83     | 0.70        | 0.91        | 0.85        | 0.88                 |
| Subject 21 - 1                     | 0.85     | 0.75        | 0.91        | 0.87        | 0.90                 |
| Subject 22 - 1                     | 0.83     | 0.70        | 0.91        | 0.85        | 0.88                 |
| Subject 23 - 1                     | 0.83     | 0.70        | 0.91        | 0.85        | 0.88                 |
| Subject 24 - 1                     | 0.85     | 0.75        | 0.91        | 0.87        | 0.90                 |
| Subject 25 - 1                     | 0.83     | 0.70        | 0.91        | 0.85        | 0.88                 |
| Subject 26 - 1                     | 0.83     | 0.70        | 0.91        | 0.85        | 0.88                 |
| Subject 27 - 1                     | 0.85     | 0.75        | 0.91        | 0.87        | 0.90                 |
| Subject 28 - 1                     | 0.85     | 0.75        | 0.91        | 0.87        | 0.90                 |
| Subject 29 - 1                     | 0.83     | 0.70        | 0.91        | 0.85        | 0.88                 |
| Subject 30 - 1                     | 0.85     | 0.75        | 0.91        | 0.87        | 0.90                 |
| Subject 1 - 2                      | 0.83     | 0.75        | 0.88        | 0.86        | 0.90                 |
| Subject 2 - 2                      | 0.83     | 0.70        | 0.91        | 0.87        | 0.90                 |
| Subject 3 - 2                      | 0.83     | 0.75        | 0.88        | 0.86        | 0.90                 |
| Subject 4 - 2                      | 0.83     | 0.75        | 0.88        | 0.86        | 0.90                 |
| Subject 5 - 2                      | 0.83     | 0.75        | 0.88        | 0.86        | 0.90                 |
| Subject 6 - 2                      | 0.83     | 0.75        | 0.88        | 0.86        | 0.90                 |
| Subject 7 - 2                      | 0.83     | 0.75        | 0.88        | 0.86        | 0.90                 |
| Subject 8 - 2                      | 0.83     | 0.75        | 0.88        | 0.86        | 0.90                 |
| Subject 9 - 2                      | 0.83     | 0.75        | 0.88        | 0.86        | 0.90                 |
| Subject 10 - 2                     | 0.83     | 0.75        | 0.88        | 0.86        | 0.90                 |
| Subject 11 - 2                     | 0.83     | 0.75        | 0.88        | 0.86        | 0.90                 |
| Subject 12 - 2                     | 0.83     | 0.70        | 0.91        | 0.83        | 0.87                 |
| Subject 13 - 2                     | 0.81     | 0.70        | 0.88        | 0.85        | 0.89                 |
| Subject 14 - 2                     | 0.83     | 0.75        | 0.88        | 0.86        | 0.90                 |
| Subject 15 - 2                     | 0.83     | 0.75        | 0.88        | 0.86        | 0.90                 |
| Subject 16 - 2                     | 0.83     | 0.75        | 0.88        | 0.86        | 0.90                 |
| Subject 17 - 2                     | 0.83     | 0.75        | 0.88        | 0.86        | 0.90                 |
| Subject 18 - 2                     | 0.83     | 0.70        | 0.91        | 0.84        | 0.88                 |

Table S2: **Intersubject prediction analysis.** Performance using the rMPS in each individual subject's High  $\Delta$ GE Regions as predictors.

| Subject Number & Number of Regions | Accuracy | Sensitivity | Specificity | AUC-Testing | AUC-Training Average |
|------------------------------------|----------|-------------|-------------|-------------|----------------------|
| Subject 19 - 2                     | 0.83     | 0.75        | 0.88        | 0.86        | 0.90                 |
| Subject 20 - 2                     | 0.83     | 0.75        | 0.88        | 0.86        | 0.90                 |
| Subject 21 - 2                     | 0.83     | 0.75        | 0.88        | 0.86        | 0.90                 |
| Subject 22 - 2                     | 0.83     | 0.75        | 0.88        | 0.86        | 0.90                 |
| Subject 23 - 2                     | 0.83     | 0.75        | 0.88        | 0.86        | 0.90                 |
| Subject 24 - 2                     | 0.83     | 0.75        | 0.88        | 0.86        | 0.90                 |
| Subject 25 - 2                     | 0.83     | 0.75        | 0.88        | 0.86        | 0.90                 |
| Subject 26 - 2                     | 0.83     | 0.75        | 0.88        | 0.86        | 0.90                 |
| Subject 27 - 2                     | 0.83     | 0.75        | 0.88        | 0.86        | 0.90                 |
| Subject 28 - 2                     | 0.83     | 0.75        | 0.88        | 0.86        | 0.90                 |
| Subject 29 - 2                     | 0.83     | 0.75        | 0.88        | 0.86        | 0.90                 |
| Subject 30 - 2                     | 0.83     | 0.75        | 0.88        | 0.86        | 0.90                 |
| Subject 1 - 3                      | 0.81     | 0.65        | 0.91        | 0.86        | 0.91                 |
| Subject 2 - 3                      | 0.83     | 0.70        | 0.91        | 0.86        | 0.90                 |
| Subject 3 - 3                      | 0.83     | 0.75        | 0.88        | 0.85        | 0.89                 |
| Subject 4 - 3                      | 0.81     | 0.70        | 0.88        | 0.84        | 0.90                 |
| Subject 5 - 3                      | 0.81     | 0.70        | 0.88        | 0.84        | 0.90                 |
| Subject 6 - 3                      | 0.81     | 0.65        | 0.91        | 0.86        | 0.91                 |
| Subject 7 - 3                      | 0.81     | 0.70        | 0.88        | 0.84        | 0.90                 |
| Subject 8 - 3                      | 0.81     | 0.65        | 0.91        | 0.86        | 0.91                 |
| Subject 9 - 3                      | 0.81     | 0.65        | 0.91        | 0.86        | 0.91                 |
| Subject 10 - 3                     | 0.81     | 0.65        | 0.91        | 0.87        | 0.91                 |
| Subject 11 - 3                     | 0.81     | 0.70        | 0.88        | 0.84        | 0.90                 |
| Subject 12 - 3                     | 0.79     | 0.65        | 0.88        | 0.82        | 0.87                 |
| Subject 13 - 3                     | 0.79     | 0.70        | 0.85        | 0.85        | 0.90                 |
| Subject 14 - 3                     | 0.81     | 0.65        | 0.91        | 0.86        | 0.91                 |
| Subject 15 - 3                     | 0.77     | 0.65        | 0.85        | 0.86        | 0.90                 |
| Subject 16 - 3                     | 0.81     | 0.70        | 0.88        | 0.84        | 0.90                 |
| Subject 17 - 3                     | 0.81     | 0.75        | 0.85        | 0.85        | 0.89                 |
| Subject 18 - 3                     | 0.81     | 0.65        | 0.91        | 0.86        | 0.91                 |
| Subject 19 - 3                     | 0.81     | 0.65        | 0.91        | 0.86        | 0.91                 |
| Subject 20 - 3                     | 0.81     | 0.65        | 0.91        | 0.86        | 0.91                 |
| Subject 21 - 3                     | 0.81     | 0.65        | 0.91        | 0.86        | 0.91                 |
| Subject 22 - 3                     | 0.81     | 0.65        | 0.91        | 0.86        | 0.91                 |
| Subject 23 - 3                     | 0.81     | 0.65        | 0.91        | 0.86        | 0.91                 |
| Subject 24 - 3                     | 0.85     | 0.70        | 0.94        | 0.87        | 0.91                 |
| Subject 25 - 3                     | 0.85     | 0.70        | 0.94        | 0.87        | 0.91                 |

Table S2: **Intersubject prediction analysis.** Performance using the rMPS in each individual subject's High  $\Delta$ GE Regions as predictors.

| Subject Number & Number of Regions | Accuracy | Sensitivity | Specificity | AUC-Testing | AUC-Training Average |
|------------------------------------|----------|-------------|-------------|-------------|----------------------|
| Subject 26 - 3                     | 0.81     | 0.65        | 0.91        | 0.86        | 0.91                 |
| Subject 27 - 3                     | 0.81     | 0.70        | 0.88        | 0.84        | 0.90                 |
| Subject 28 - 3                     | 0.81     | 0.65        | 0.91        | 0.86        | 0.91                 |
| Subject 29 - 3                     | 0.87     | 0.80        | 0.91        | 0.88        | 0.93                 |
| Subject 30 - 3                     | 0.81     | 0.65        | 0.91        | 0.86        | 0.91                 |
| Subject 1 - 4                      | 0.79     | 0.70        | 0.85        | 0.83        | 0.90                 |
| Subject 2 - 4                      | 0.81     | 0.70        | 0.88        | 0.85        | 0.90                 |
| Subject 3 - 4                      | 0.83     | 0.70        | 0.91        | 0.83        | 0.91                 |
| Subject 4 - 4                      | 0.85     | 0.70        | 0.94        | 0.86        | 0.91                 |
| Subject 5 - 4                      | 0.75     | 0.65        | 0.82        | 0.83        | 0.90                 |
| Subject 6 - 4                      | 0.75     | 0.65        | 0.82        | 0.83        | 0.90                 |
| Subject 7 - 4                      | 0.75     | 0.65        | 0.82        | 0.83        | 0.90                 |
| Subject 8 - 4                      | 0.75     | 0.65        | 0.82        | 0.83        | 0.90                 |
| Subject 9 - 4                      | 0.75     | 0.65        | 0.82        | 0.83        | 0.90                 |
| Subject 10 - 4                     | 0.85     | 0.75        | 0.91        | 0.86        | 0.92                 |
| Subject 11 - 4                     | 0.75     | 0.65        | 0.82        | 0.83        | 0.90                 |
| Subject 12 - 4                     | 0.81     | 0.65        | 0.91        | 0.86        | 0.91                 |
| Subject 13 - 4                     | 0.79     | 0.70        | 0.85        | 0.85        | 0.91                 |
| Subject 14 - 4                     | 0.75     | 0.65        | 0.82        | 0.83        | 0.90                 |
| Subject 15 - 4                     | 0.75     | 0.60        | 0.85        | 0.85        | 0.90                 |
| Subject 16 - 4                     | 0.75     | 0.65        | 0.82        | 0.83        | 0.90                 |
| Subject 17 - 4                     | 0.87     | 0.80        | 0.91        | 0.86        | 0.95                 |
| Subject 18 - 4                     | 0.75     | 0.65        | 0.82        | 0.83        | 0.90                 |
| Subject 19 - 4                     | 0.75     | 0.65        | 0.82        | 0.83        | 0.90                 |
| Subject 20 - 4                     | 0.81     | 0.70        | 0.88        | 0.86        | 0.91                 |
| Subject 21 - 4                     | 0.85     | 0.75        | 0.91        | 0.87        | 0.95                 |
| Subject 22 - 4                     | 0.85     | 0.75        | 0.91        | 0.86        | 0.92                 |
| Subject 23 - 4                     | 0.75     | 0.65        | 0.82        | 0.83        | 0.90                 |
| Subject 24 - 4                     | 0.81     | 0.70        | 0.88        | 0.86        | 0.91                 |
| Subject 25 - 4                     | 0.81     | 0.70        | 0.88        | 0.86        | 0.91                 |
| Subject 26 - 4                     | 0.85     | 0.75        | 0.91        | 0.87        | 0.93                 |
| Subject 27 - 4                     | 0.75     | 0.65        | 0.82        | 0.83        | 0.90                 |
| Subject 28 - 4                     | 0.75     | 0.65        | 0.82        | 0.83        | 0.90                 |
| Subject 29 - 4                     | 0.85     | 0.75        | 0.91        | 0.87        | 0.93                 |
| Subject 30 - 4                     | 0.75     | 0.65        | 0.82        | 0.83        | 0.90                 |
